# Supplementary material
Source: publisher figshare collection journal article supplement (https://acs.figshare.com/ndownloader/files/4757938)

**Supporting Information for**  
**Spectroscopic Evidence for Ca<sup>2+</sup> Involvement in the Assembly of**  
**the Mn<sub>4</sub>Ca Cluster in the Photosynthetic Water Oxidizing**  
**Complex<sup>†</sup>**

*Alexei M. Tyryshkin<sup>‡\*</sup>, Richard K. Watt<sup>§</sup>, Sergei V. Baranov<sup>||</sup>, Jyotishman Dasgupta,*

*Michael P. Hendrich<sup>⊥</sup>, G. Charles Dismukes\**

Princeton University, Department of Chemistry and the Princeton Environmental Institute,

Princeton, NJ 08544; and Carnegie Mellon University, Department of Chemistry,

Pittsburgh, PA 15213

**Present addresses:** <sup>‡</sup>Department of Electrical Engineering, Princeton University, Princeton, NJ; <sup>§</sup>University of New Mexico, Albuquerque, NM; <sup>||</sup>Burke Medical Research Institute, White Plains, NY; <sup>⊥</sup>Carnegie Mellon University, Pittsburgh, PA

**\*Correspondence to:** Alexei M. Tyryshkin, phone: 609-258-4167, email: [atyryshk@princeton.edu](mailto:atyryshk@princeton.edu), and G. Charles Dismukes, phone: 609-258-3949, fax: 609-258-1980, email: [dismukes@princeton.edu](mailto:dismukes@princeton.edu),

---

<sup>†</sup> This work was supported by grants from the National Institute of Health (GM 39932) and by an international cooperation grant from the NIH –Fogarty program (RO3 TWO5553-01).

Figure S1. Light-induced loss of the  $\text{Mn}^{2+}$  signal after 15 min illumination at  $-20\text{ }^{\circ}\text{C}$  of PSII at different pH. All samples contain  $24\text{ }\mu\text{M}$  apo-WOC-PSII and  $120\text{ }\mu\text{M}$   $\text{Mn}^{2+}$  ( $5\text{Mn}^{2+}/\text{PSII}$ ). Buffer: MES/pH 6-6.5 and HEPES/pH 7.5.

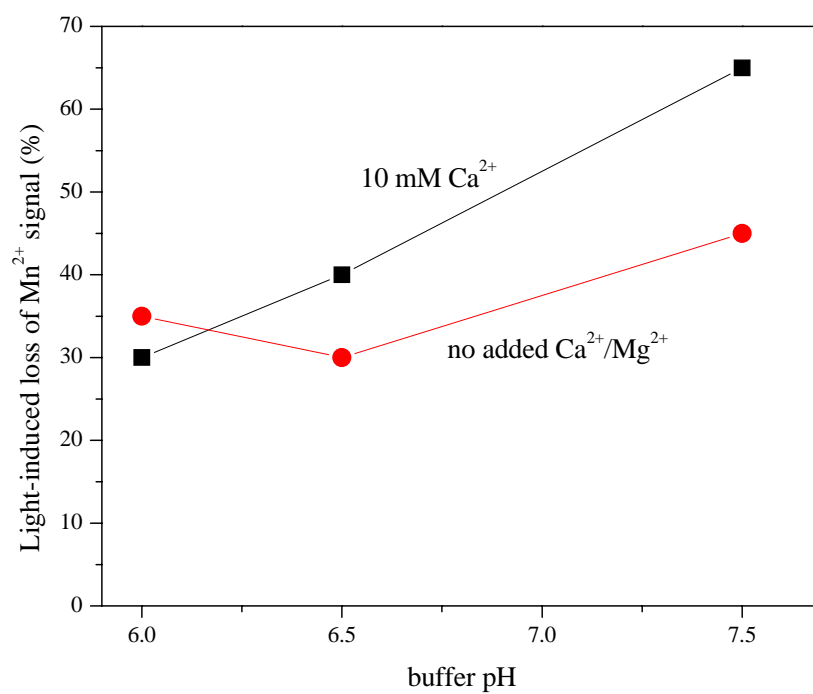

Figure S2.  $\text{Mn}^{3+}$  EPR signals in apo-WOC-PSII (40  $\mu\text{M}$ ) in the presence of varied concentration of  $\text{Mn}^{2+}$  (0, 0.5, 1, 2, 4, 8, 16  $\text{Mn}^{2+}/\text{PSII}$ ) after illumination at  $-20^\circ\text{C}$  for 13.5 minutes (A) in the absence of and (B) in the presence of 8 mM  $\text{Ca}^{2+}$  (pH 7.5). Measurements were done using parallel-mode EPR at 4.2 K. Other experimental conditions are the same as described in Fig 1 in the main text.

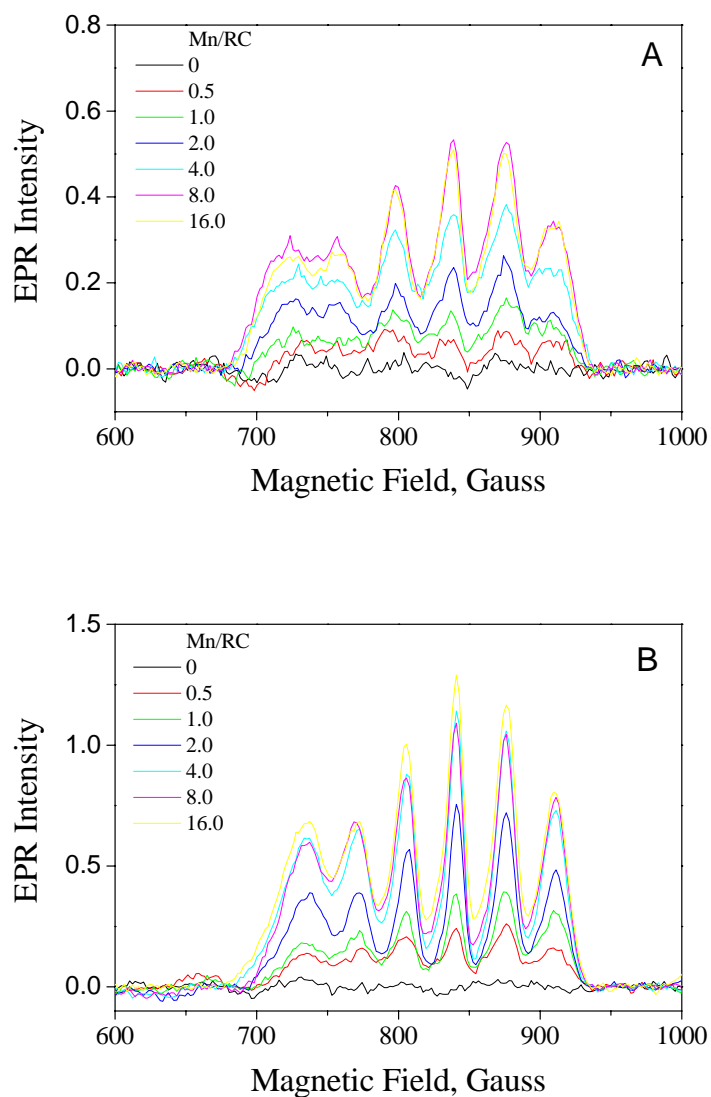

Figure S3. Experimental (blue) and simulated (red) parallel-mode EPR spectra of  $\text{Mn}^{3+}$  in apo-WOC-PSII at pH 6.5 (top) and pH 9 (bottom) at 3.7 K. The simulation parameters are shown next to each spectrum and obtained from the spectral analysis described in the text (Table 1). However, the E/D ratio was slightly altered from the value in table 1, but well within the error limits stated. The intensity of the experimental spectrum at pH9 had to be scaled down by factor 0.34, in order to fit the simulated spectrum intensity. This scaling indicates that the number of EPR-active  $\text{Mn}^{3+}$  is 3 times greater at pH 9 as compared to pH 6.5.

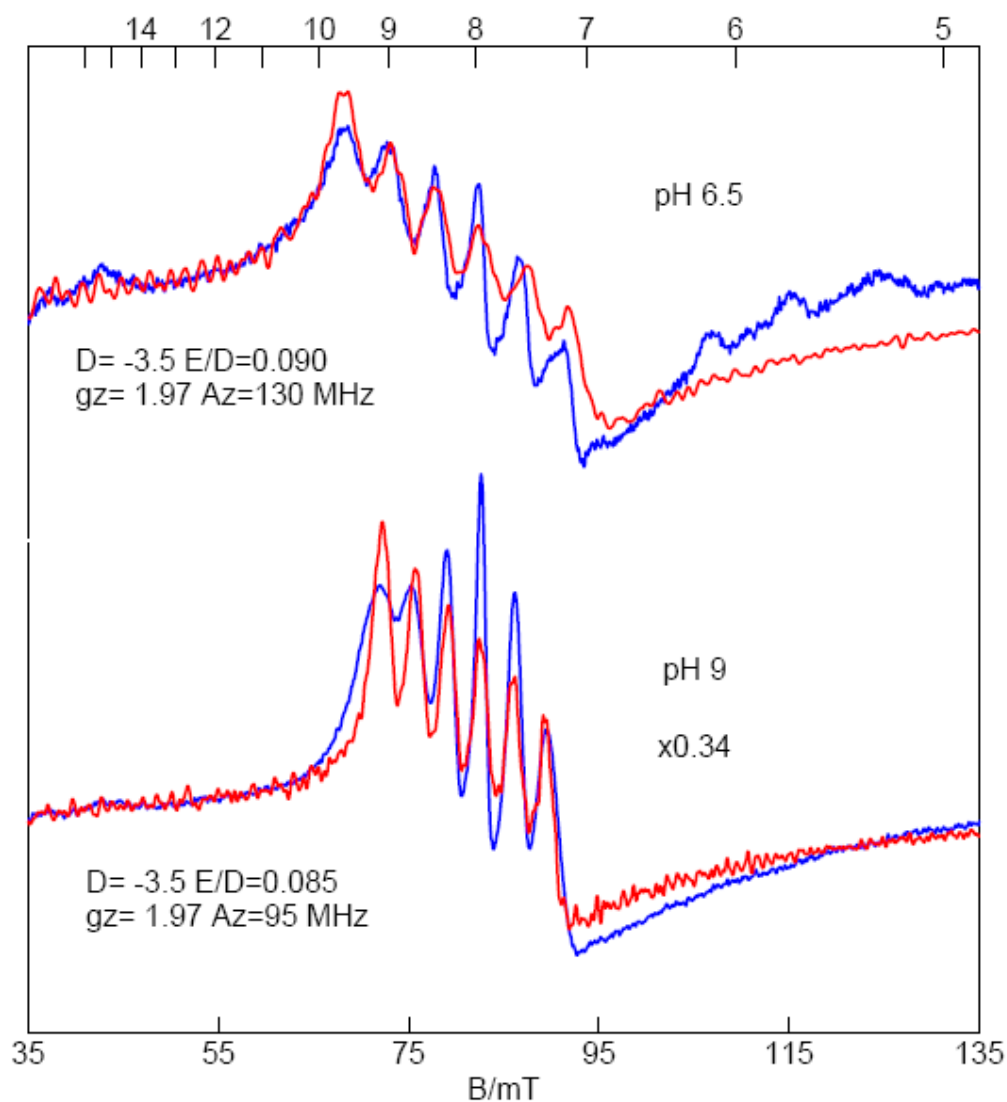

Supplement: Supplementary file 1 [file 4757938]
